# Supplementary material for: Adherence to a healthy lifestyle behavior composite score and cardiometabolic risk factors in Spanish children from the CORALS cohort
Source: Eur J Pediatr. 2024 Jan 23;183(4):1819–30. doi: 10.1007/s00431-023-05389-z (PMC11001667; doi:10.1007/s00431-023-05389-z)
Supplement: Supplementary file 2 — Supplementary file2 (DOCX 23.9 KB) [file 431_2023_5389_MOESM2_ESM.docx]

**ADHERENCE TO A HEALTHY LIFESTYLE BEHAVIOR COMPOSITE SCORE AND CARDIOMETABOLIC RISK FACTORS IN SPANISH CHILDREN FROM THE CORALS COHORT**

Tany E. Garcidueñas-Fimbres1,2,3, MD, PhD; Carlos Gómez-Martínez1,2,3, MSc; Maria Pascual-Compte1,2, MSc; Jose Manuel Jurado-Castro3,4,, PhD; Rosaura Leis3,5,6, MD, PhD; Luis A. Moreno3,7,8, MD, PhD; Santiago Navas-Carretero3,9,10, PhD; Pilar Codoñer-Franch3,11, MD, PhD; Ana Moreira Echeverria12, MD; Belén Pastor-Villaescusa4, PhD; Alicia López-Rubio5,6, MSc; Sara Moroño García13, RN; Pilar De Miguel-Etayo3,7,8, PhD; J. Alfredo Martínez3,9, MD, PhD; Inmaculada Velasco Aguayo4, PhD; Rocío Vázquez-Cobela3,5,6, PhD; Joaquín Escribano2,14, MD, PhD; María Luisa Miguel-Berges3,7,8, PhD; María José De La Torre-Aguilar4, MD, PhD; Mercedes Gil-Campos3,4, MD, PhD; Jordi Salas-Salvadó1,2,3*,MD, PhD; Nancy Babio1,2,3*.

**Affiliations**

1Universitat Rovira i Virgili, Departament de Bioquímica i Biotecnologia, Unitat de Nutrició Humana. Reus, Spain

2Institut d'Investigació Sanitària Pere Virgili (IISPV) Reus, Spain.

3Centro de Investigación Biomédica en Red de Fisiopatología de la Obesidad y Nutrición(CIBEROBN), Instituto de Salud Carlos III (ISCIII), Madrid, Spain.

4Metabolism and Investigation Unit, Reina Sofia University Hospital. Maimonides Biomedical Research Institute of Cordoba (IMIBIC). University of Córdoba; Córdoba 14004, Spain.

5Unit of Pediatric Gastroenterology, Hepatology and Nutrition. Pediatric Service. Hospital Clínico Universitario de Santiago. 15706. Santiago de Compostela, Spain.

6Pediatric Nutrition Research Group, Health Research Institute of Santiago de Compostela (IDIS). Unit of Investigation in Nutrition, Growth and Human Development of Galicia-USC. 15706 Santiago de Compostela, Spain.

7Growth, Exercise, Nutrition and Development (GENUD) Research Group, University of Zaragoza, Zaragoza, Spain.

8Instituto Agroalimentario de Aragón (IA2). Instituto de Investigación Sanitaria de Aragón (IIS Aragón), Zaragoza, Spain.

9University of Navarra, Center for Nutrition Research, 31008 Pamplona, Spain; University of Navarra, Fac Pharm & Nutr, Dept Nutr Food Sci & Physiol, 31008, Pamplona, Spain.

10IdisNA, Navarra Institute for Health Research, Pamplona, Spain.

11Dr. Peset University Hospital. Department of Pediatrics, Obstetrics and Gynecology, University of Valencia, Valencia, Spain.

12Fundació Hospital Sant Joan de Deu Martorell, Barcelona, Spain.

13EDP Salut Sant Joan Baix Camp-ABS Riudoms, Riudoms, Spain.

14Paediatrics, Nutrition, and Development Research Unit, Hospital Universitari Sant Joan de Reus. Universitat Rovira i Virgili, Reus, Spain.

*Corresponding authors: **Nancy Babio** [nancy.babio@urv.cat] and **Jordi Salas-Salvadó** [jordi.salas@urv.cat], Unitat de Nutrició Humana, Departament de Bioquímica i Biotecnología, Universitat Rovira i Virgili. Tel: +34 977 75 93 13, Fax: +34 977 75 93 22.

| **Supplemental Table 1.** Dietary characteristics of the study participants across categories of adherence to the composite score comprised of 6 healthy lifestyle behaviors. | | | | |
| --- | --- | --- | --- | --- |
|  | **Tertiles of adherence to the healthy lifestyle behavior composite score** | | | |
|  | **T1** (<3 points)  n=392 | **T2** (3-4 points)  n=296 | **T3** (>4 points)  n=250 | **p value** |
| **Dietary intake contribution** |  |  |  |  |
| Total energy intake, kcal/day | 1752 ± 378ab | 1674 ± 352a | 1642 ± 304b | **<0.001** |
| Carbohydrates, % of total energy intake | 43.5 ± 5.7b | 42.7 ± 5.0 | 42.2 ± 5.6b | **0.009** |
| Proteins, % of total energy intake | 14.7 ± 2.1ab | 15.2 ± 2.1a | 15.2 ± 2.1b | **<0.001** |
| Protein intake per body weight, g/kg/day | 3.2 ± 1.0 | 3.3 ± 0.9 | 3.4 ± 0.9 | 0.058 |
| Total fat, % of total energy intake | 41.9 ± 5.8 | 42.1 ± 5.4 | 42.6 ± 6.3 | 0.293 |
| Saturated fatty acids, % of total energy intake | 14.0 ± 2.0 | 14.0 ± 2.0 | 13.8 ± 2.0 | 0.579 |
| Monounsaturated fatty acids, % of total energy intake | 18.5 ± 4.4b | 19.0 ± 4.1 | 19.6 ± 5.0b | **0.013** |
| Polyunsaturated fatty acids, % of total energy intake | 6.3 ± 1.9 | 6.0 ± 1.4 | 6.0 ± 1.5 | **0.034** |
| Fiber, g/1,000 kcal | 8.0 ± 2.1ab | 8.5 ± 2.3ac | 9.2 ± 2.5bc | **<0.001** |
| ≥14 gr/1000 kcal, % (n) | 1.3 (5) | 3.4 (10) | 6.4 (16) | **0.002** |
| Sodium, mg/dL | 2383 ± 737b | 2322 ± 694 | 2182 ± 672b | **0.002** |
| **Dairy products** |  |  |  |  |
| Milk, g/day | 329.4 ± 227.8 | 331.1 ± 242.9 | 291.8 ± 216.1 | 0.078 |
| Yogurt, g/day | 110.4 ± 98.4 | 118.1 ± 97.2 | 104.1 ± 80.1 | 0.214 |
| Cheese, g/day | 11.9 ± 12.0b | 11.5 ± 12.6c | 14.6 ± 11.3bc | **0.006** |
| Other dairy products, g/day | 104.3 ± 102.9ab | 75.7 ± 85.4a | 64.9 ± 73.1b | **<0.001** |
| **Protein foods** |  |  |  |  |
| White meat, g/day | 24.2 ± 9.5 | 23.9 ± 9.8 | 24.7 ± 8.2 | 0.598 |
| Unprocessed red meat, g/day | 18.8 ± 13.6 | 19.3 ± 11.9 | 18.6 ± 12.6 | 0.809 |
| Processed and derivatives meat products, g/day | 26.6 ± 16.2b | 25.2 ± 14.6 | 23.5 ± 13.0b | **0.036** |
| Egg, g/day | 22.7 ± 9.8 | 24.4 ± 9.1 | 23.3 ± 8.3 | 0.053 |
| Fish and seafood, g/day | 30.6 ± 17.7ab | 35.8 ± 17.3a | 36.3 ± 17.0b | **<0.001** |
| **Vegetables and fruits** |  |  |  |  |
| Vegetables, g/day | 70.6 ± 53.6b | 75.3 ± 47.3c | 88.3 ± 51.6bc | **<0.001** |
| Tubers, g/day | 42.8 ± 20.0b | 40.0 ± 19.7 | 37.6 ± 17.9b | **0.003** |
| Fruits, g/day | 163.2 ± 114.1ab | 193.2 ± 113.1ac | 217.9 ± 130.4bc | **<0.001** |
| **Nuts** |  |  |  |  |
| Nuts, g/day | 3.1 ± 4.2b | 3.6 ± 5.3 | 4.5 ± 5.4b | **0.001** |
| **Cereals and Legumes** |  |  |  |  |
| Legumes, g/day | 14.5 ± 8.3 | 13.6 ± 6.1 | 14.1 ± 6.1 | 0.248 |
| Refined cereals, g/day | 74.5 ± 36.9 | 70.8 ± 32.4 | 71.1 ± 36.2 | 0.312 |
| Whole cereals, g/day | 5.8 ± 13.2b | 8.2 ± 15.0c | 11.4 ± 18.8bc | **<0.001** |
| **Miscellaneous** |  |  |  |  |
| Oil and fats, g/day | 26.0 ± 15.9 | 25.9 ± 14.6 | 27.8 ± 16.8 | 0.303 |
| Pastries, g/day | 43.5 ± 31.8b | 39.0 ± 28.6 | 35.9 ± 25.1b | **0.005** |
| Sugars and candies, g/day | 14.9 ± 11.4ab | 12.8 ± 10.6a | 11.1 ± 9.1b | **<0.001** |
| **Beverages** |  |  |  |  |
| Water, ml/day | 855.3 ± 359.4 | 846.2 ± 359.8 | 865.4 ± 409.9 | 0.837 |
| Sugary beverages, ml/day | 132.3 ± 145.8ab | 101.1 ± 109.2a | 92.5 ± 107.9b | **<0.001** |
| Tea and infusions, ml/day | 6.3 ± 27.6 | 7.6 ± 33.4 | 6.9 ± 26.1 | 0.855 |
| Data are expressed as mean ± SD.  P-values were calculated by the ANOVA. The p values <0.05 were considered significant.  The Bonferroni’s test for multiple comparisons was used for those significant results calculated by analysis of covariance. Significant differences (p value <0.05) between categories of adherence to the 6-healthy lifestyle behaviors composite score are expressed as: a=T1vs. T2; b=T1 vs. T3 and c=T2 vs. T3. | | | | |
